# Supplementary material
Source: publisher figshare collection journal article supplement (https://frontiersin.figshare.com/ndownloader/files/22551473)
Supplement: Supplementary file [file 22551473]

## Supplementary Material

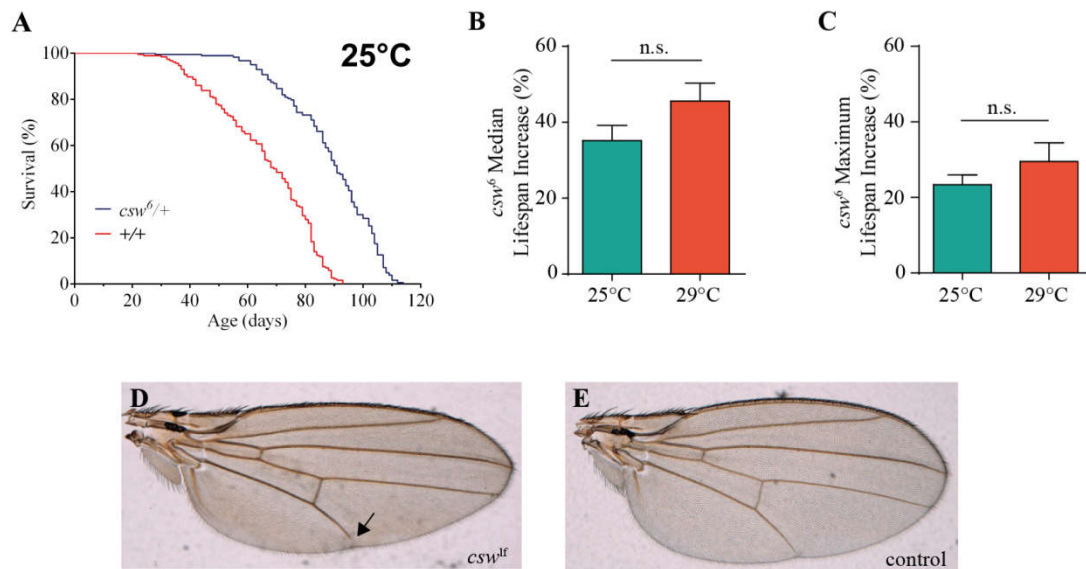

**Supplementary Figure 1. LOF  $csw$  phenotypes in lifespan and wing veins.** (A) Effect of the LOF  $csw^6$  allele on lifespan at 25°C,  $p < 0.0001$ , Log-Rank test. The number of animals was  $n = 210$  to  $227$ , from nine independent experiments. (B-C) Proportion of the effect of the LOF  $csw^6$  allele on median (B) and maximum lifespan (C) at 25°C ( $n = 9$ ) and 29°C ( $n = 4$ );  $p > 0.05$ , t-test. (D) LOF phenotypes as incomplete L5 vein (arrow) produce by the  $csw^{lf}$  allele compared with control  $w^{1118}$  (E).

## Supplementary Material

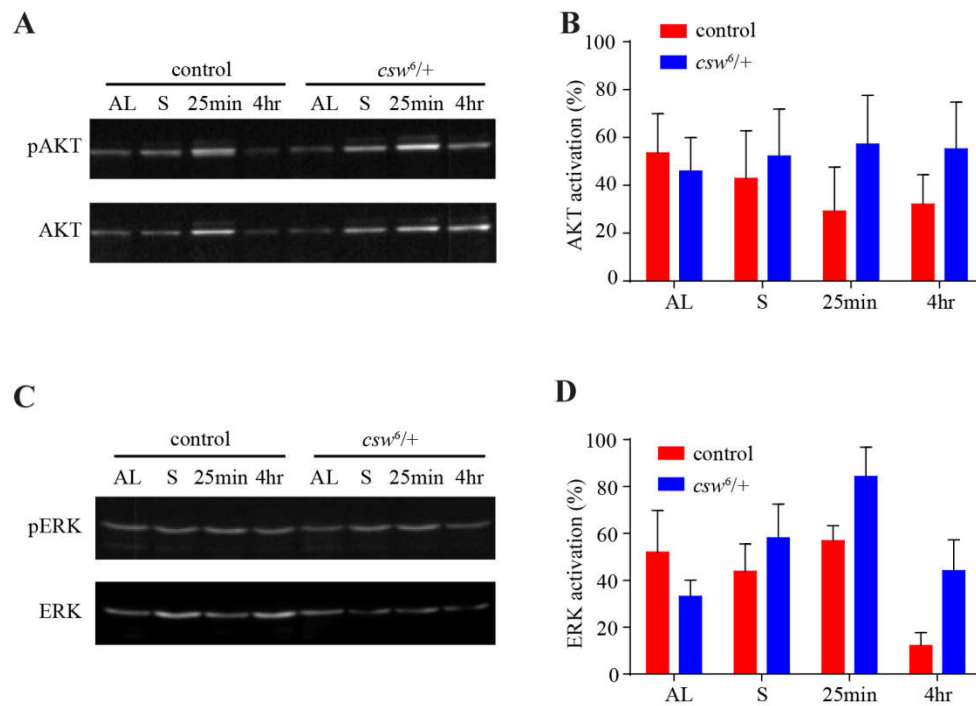

**Supplementary Figure 2. (A-D)** Western blot of adult fly extracts in control and *csw* mutant flies using anti-AKT and anti-phospho-AKT, showing blot example **(A)** and AKT activation as pAKT/AKT **(B)**; and using anti-ERK and anti-phospho-ERK, showing blot example **(C)** and ERK activation as pERK/ERK **(D)**. Feeding treatments were, ad libitum (AL), starved for 16 hr (S), 25 min after refeeding (25min) and 4 hr after refeeding (4hr). n=4 in all cases, except for AKT and pAKT 25min n=3. Two-way ANOVA, p>0.05.

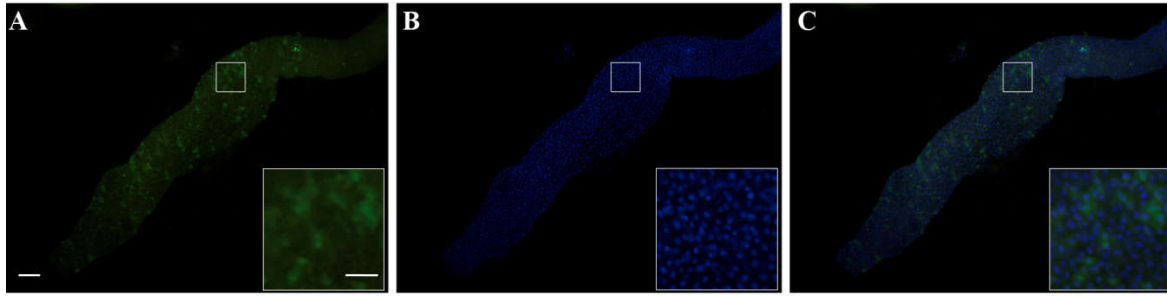

**Supplementary Figure 3. Activation of ERK and AKT in adult tissues.** Immunostaining in young midgut of control flies after 1% H<sub>2</sub>O<sub>2</sub> for 16 hr showing (A) dp-ERK staining, (B) DNA staining using DAPI and (C) Merge. Bar represents 100 µm, inset 25 µm.

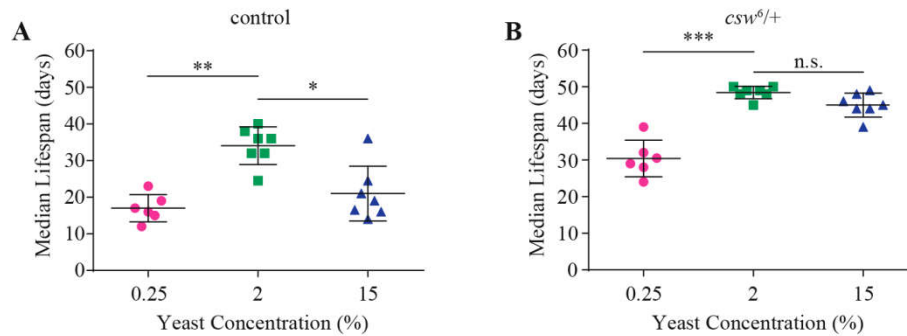

**Supplementary Figure 4. Effect of rich and poor yeast diet on survival.** Median lifespan recorded in control (A) and LOF *csw*<sup>6</sup> (B) flies cultured in different yeast concentrations. Each data point represents an independent experiment including 25-30 animals per data point (Median ± standard deviation). Note that LOF *csw*<sup>6</sup> was insensitive to high yeast concentration (15%). Asterisks indicate \* p<0.05, \*\* p<0.01 and \*\*\* p< 0.001, ANOVA Kruskal-Wallis.

## Supplementary Material

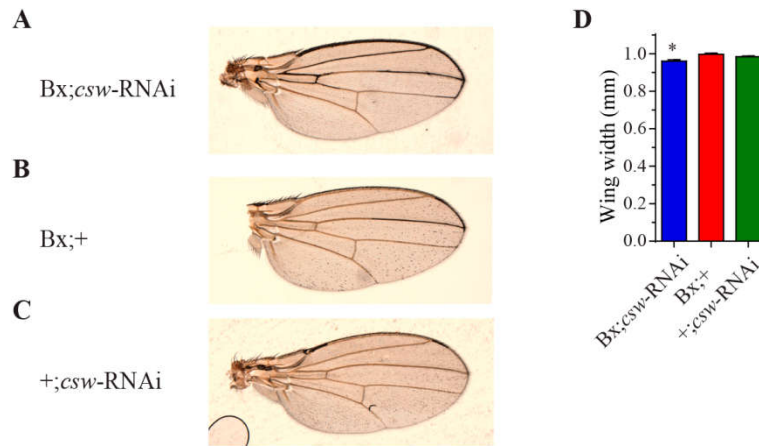

**Supplementary Figure 5. Wing phenotype produced by *csw*-RNAi.** (A-C) Effect of *csw-RNAi* expressed in the dorsal wing disc (*Bx;csw-RNAi*) (A) and parental controls (B and C). (D) Quantification of wing width in *Bx;csw-RNAi* compared with parental controls *Bx;+* ( $p < 0.01$ ) and *+;csw-RNAi* ( $p < 0.05$ ),  $n=8$ , ANOVA followed by Dunnett test.

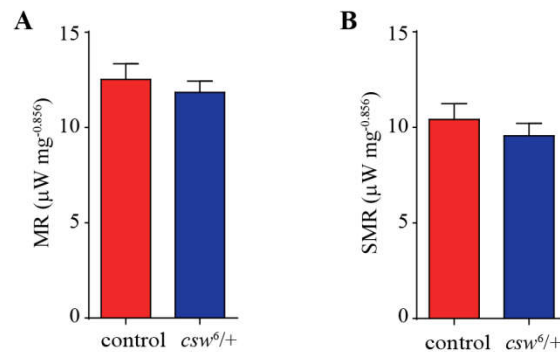

**Supplementary Figure 6. Mass specific metabolic rate and standard metabolic rate in old flies.** (A) Mass-corrected metabolic rate ( $\mu\text{Watts/mg}^{-0.856}$ ). LOF *csw* mutants ( $n=10$ ) compared with control group ( $n=9$ ). (B) Mass-corrected standard metabolic rate ( $\mu\text{Watts/mg}^{-0.856}$ ). Old (37-39 days) LOF *csw* mutants ( $n=8$ ) compared with control group ( $n=8$ ). Bars, means  $\pm$  SEM. t-test  $p > 0.05$ .

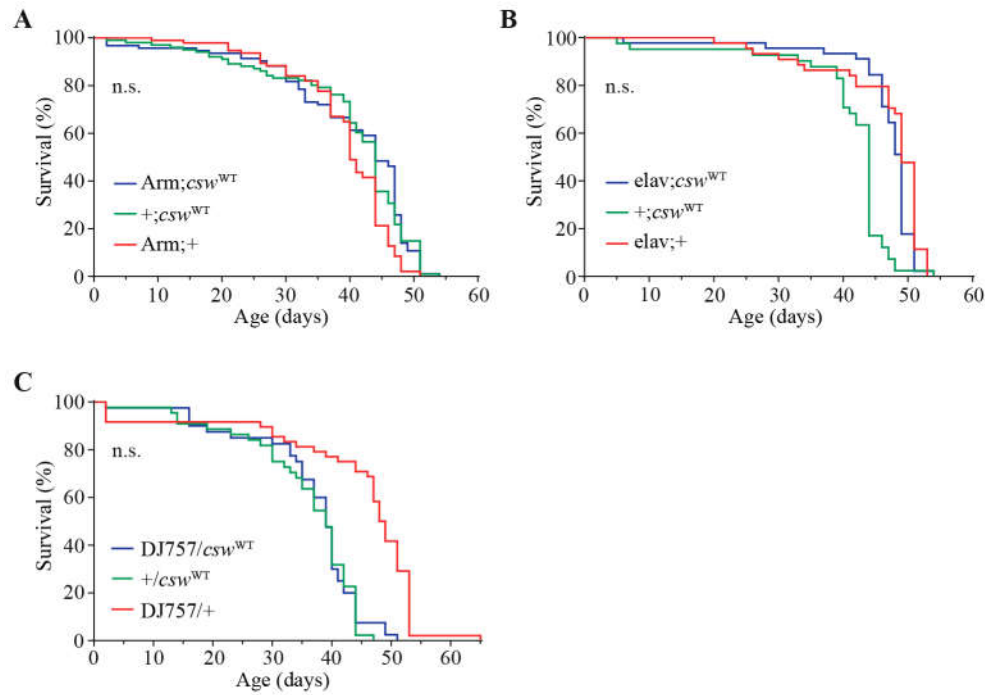

**Supplementary Figure 7. Overexpression of *csw*<sup>WT</sup> allele in all cells of the body, neurons or muscle did not affect lifespan.** (A-C) Survival curves showing no effect of *csw*<sup>WT</sup> driven to specific tissues by GAL4. (A) All the cells of the body (*Arm*; *csw*<sup>WT</sup>) and parental lines (*+*; *csw*<sup>WT</sup> and *Arm*; *+*). (B) Neurons by the specific GAL4 driver (*elav*; *csw*<sup>WT</sup>) and parental lines (*+*; *csw*<sup>WT</sup> and *elav*; *+*). (C) Muscle by the specific GAL4 driver (*DJ757*; *csw*<sup>WT</sup>) and parental lines (*+*; *csw*<sup>WT</sup> and *DJ757*; *+*). Log-Rank test, corrected for multiple comparisons.

## Supplementary Material

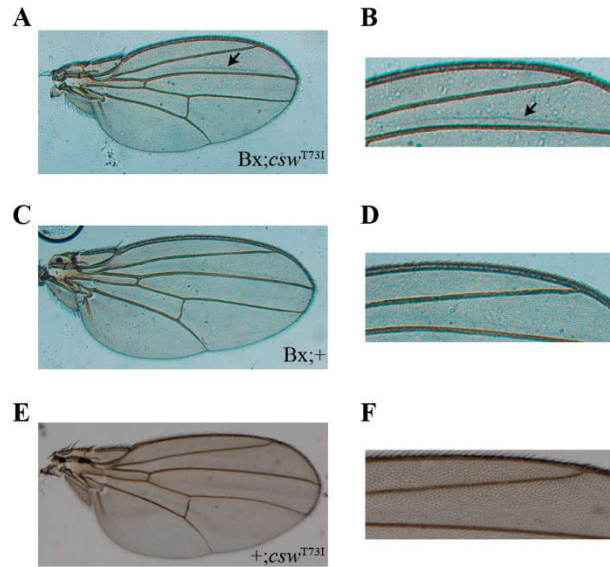

**Supplementary Figure 8. Ectopic wing vein produced by GOF *csw<sup>T73I</sup>* allele.** Wing vein phenotype (arrow) produced by GOF *csw<sup>T73I</sup>* allele expressed in wing by Bx-GAL4 (A-B) and wings in parental controls (C-F).
